# Supplementary material for: Metal Binding and Sources of Humic Substances in Recent Sediments from the Cananéia-Iguape Estuarine-Lagoon Complex (South-Eastern Brazil)
Source: MDPI journal article supplement (doi:10.3390/app11188466), 2021-09-12
Supplement: s1 [file s1]

## Supplementary Material

**Table S1.** Coordinates of sampling locations and geochemical parameters measured (n.d. = not determined).

| Station # | Lat (°)  | Long (°) | Depth (m) | CaCO <sub>3</sub> (%) | TOC (%) | TN (%) | $\delta^{13}\text{C}_{\text{SOM}}$ (‰) (V-PDB) | Sand (%) | Silt (%) | Clay (%) | $\delta^{13}\text{C}_{\text{FHA}}$ (‰) (V-PDB) | FHA TOC/TN | $\delta^{13}\text{C}_{\text{BHA}}$ (‰) (V-PDB) | BHA TOC/TN | $\delta^{13}\text{C}_{\text{FA}}$ (‰) (V-PDB) | FA TOC/TN | [FHA] (mg g <sup>-1</sup> ) | [BHA] (mg g <sup>-1</sup> ) | [FA] (mg g <sup>-1</sup> ) | [HS] (mg g <sup>-1</sup> ) |
|-----------|----------|----------|-----------|-----------------------|---------|--------|------------------------------------------------|----------|----------|----------|------------------------------------------------|------------|------------------------------------------------|------------|-----------------------------------------------|-----------|-----------------------------|-----------------------------|----------------------------|----------------------------|
| 1         | -25.2498 | -48.0502 | 0.2       | 6.4                   | 3.04    | 0.22   | -24.0                                          | 33.8     | 62.2     | 3.9      | -21.6                                          | 10.20      | -22.0                                          | 14.93      | -23.81                                        | 23.70     | 1.85                        | 5.73                        | 3.40                       | 10.98                      |
| 2         | -25.1938 | -47.9993 | 6.6       | 3.4                   | 0.67    | 0.03   | -27.0                                          | 67.4     | 30.4     | 2.2      | -23.3                                          | 5.83       | -24.6                                          | 11.30      | -25.98                                        | 22.72     | 0.26                        | 0.73                        | 0.69                       | 1.68                       |
| 3         | -25.1749 | -48.0265 | 5.7       | 8.0                   | 0.60    | 0.05   | -26.7                                          | 60.4     | 36.9     | 2.7      | n.d.                                           | n.d.       | -24.5                                          | 18.62      | -25.71                                        | 32.68     | 0.10                        | 0.92                        | 0.74                       | 1.76                       |
| 4         | -25.0738 | -47.9811 | 10.7      | 0.0                   | 1.94    | 0.17   | -25.9                                          | 43.0     | 54.0     | 3.0      | -22.6                                          | 6.55       | -23.8                                          | 11.13      | -25.26                                        | 18.96     | 1.15                        | 4.30                        | 3.41                       | 8.86                       |
| 5         | -25.0466 | -47.9164 | 13.8      | 11.5                  | 3.73    | 0.31   | -26.3                                          | 40.2     | 56.2     | 3.6      | -23.3                                          | 8.01       | -24.4                                          | 11.96      | -25.87                                        | 20.05     | 2.72                        | 3.37                        | 3.90                       | 9.98                       |
| 6         | -25.0318 | -47.9150 | 9.8       | 6.8                   | 1.24    | 0.07   | -26.5                                          | 47.8     | 48.5     | 3.8      | -23.3                                          | 10.73      | -23.6                                          | 15.18      | -25.20                                        | 21.80     | 0.34                        | 0.71                        | 0.44                       | 1.49                       |
| 7         | -25.0115 | -47.9241 | 4.8       | 1.3                   | 0.73    | 0.04   | n.d.                                           | 97.5     | 2.5      | 0.0      | -25.1                                          | 13.21      | -25.4                                          | 17.68      | -26.27                                        | 31.68     | 0.17                        | 0.37                        | 0.52                       | 1.06                       |
| 8         | -24.9986 | -47.8973 | 11.6      | 4.0                   | 0.94    | 0.08   | -26.2                                          | 45.3     | 51.1     | 3.6      | -23.5                                          | 10.58      | -24.0                                          | 15.45      | -25.14                                        | 23.27     | 0.46                        | 1.00                        | 0.93                       | 2.39                       |
| 9         | -24.9592 | -47.8934 | 12.2      | 3.9                   | 0.73    | 0.08   | -26.6                                          | 48.3     | 48.6     | 3.1      | -24.3                                          | 9.18       | -25.0                                          | 13.82      | -26.49                                        | 22.49     | 1.58                        | 1.64                        | 1.52                       | 4.74                       |
| 10        | -24.9642 | -47.8642 | 10.7      | 2.9                   | 0.79    | 0.04   | -25.3                                          | 57.3     | 39.0     | 3.7      | -23.2                                          | 12.02      | -24.1                                          | 18.20      | -25.27                                        | 25.92     | 0.60                        | 0.75                        | 0.73                       | 2.08                       |
| 11        | -25.0335 | -48.0138 | 3.7       | 0.5                   | 0.06    | 0.01   | n.d.                                           | 97.2     | 2.8      | 0.0      | -28.0                                          | 8.43       | -27.2                                          | 10.17      | -26.90                                        | 24.61     | 0.06                        | 0.04                        | 0.13                       | 0.23                       |
| 12        | -25.0202 | -47.9825 | 9.0       | n.d.                  | 1.07    | 0.08   | n.d.                                           | 62.8     | 32.7     | 4.5      | -26.0                                          | 10.34      | -26.1                                          | 13.97      | -26.96                                        | 23.22     | 1.22                        | 0.73                        | 0.71                       | 2.66                       |
| 13        | -25.0202 | -47.9825 | 6.2       | 4.9                   | 1.10    | 0.10   | -25.6                                          | 45.2     | 51.5     | 3.3      | -22.9                                          | 7.05       | -24.3                                          | 12.51      | -25.61                                        | 21.28     | 0.47                        | 1.15                        | 1.10                       | 2.72                       |
| 14        | -24.9493 | -47.9111 | 0.2       | n.d.                  | 4.76    | 0.33   | -25.2                                          | 39.3     | 58.1     | 2.6      | -23.7                                          | 7.29       | -24.6                                          | 12.22      | -25.85                                        | 22.86     | 3.76                        | 7.83                        | 3.62                       | 15.20                      |
| 15        | -24.9167 | -47.8765 | 2.8       | 5.1                   | 1.10    | 0.10   | -26.8                                          | 54.3     | 42.9     | 2.9      | -23.3                                          | 6.40       | -24.4                                          | 11.18      | -25.78                                        | 19.60     | 0.45                        | 0.72                        | 1.20                       | 2.37                       |
| 16        | -24.8161 | -47.6958 | 3.4       | 4.5                   | 2.59    | 0.24   | -27.5                                          | 7.8      | 85.7     | 6.6      | -26.0                                          | 10.47      | -26.1                                          | 12.29      | -26.81                                        | 22.02     | 9.23                        | 2.56                        | 3.09                       | 14.88                      |
| 17        | -24.7937 | -47.6725 | 3.1       | 5.2                   | 2.65    | 0.21   | -28.3                                          | 16.3     | 77.2     | 6.5      | -26.2                                          | 10.44      | -26.3                                          | 12.60      | -27.04                                        | 22.08     | 6.56                        | 2.74                        | 2.48                       | 11.78                      |
| 18        | -24.7686 | -47.6429 | 2.8       | 5.2                   | 2.41    | 0.18   | -28.0                                          | 17.1     | 76.7     | 6.2      | -25.9                                          | 11.64      | -25.9                                          | 14.28      | -26.65                                        | 21.41     | 5.90                        | 1.82                        | 2.24                       | 9.96                       |

**Table S2.** Metal concentrations ( $\mu\text{g g}^{-1}$ ) in FHA, BHA, and FA (n.d. = not determined).

| Station | FHA  | BHA  | FA   |
|---------|------|------|------|------|------|------|------|------|------|------|------|------|------|------|------|------|------|------|------|------|------|------|------|------|
| #       | Pb   | V    | Cr   | Mn   | Ni   | Cu   | Zn   | As   | Pb   | V    | Cr   | Mn   | Ni   | Cu   | Zn   | As   | Pb   | V    | Cr   | Mn   | Ni   | Cu   | Zn   | As   |
| 1       | 2.30 | 13.9 | 58.9 | 10.7 | 29.2 | 61.5 | 19.8 | 7.32 | 2.86 | 6.01 | 103  | 2.98 | 39.0 | 72.7 | 15.4 | 7.22 | 0.66 | 3.30 | 33.3 | 3.32 | 2.71 | 12.3 | 13.5 | 5.52 |
| 2       | 3.36 | 8.13 | 22.1 | 11.9 | 17.4 | 95.6 | 104  | 6.00 | 2.88 | 11.2 | 62.5 | 12.6 | 24.7 | 72.6 | 40.8 | 5.83 | 1.11 | 2.12 | 45.7 | 10.4 | 6.83 | 24.8 | 19.4 | 8.88 |
| 3       | 5.08 | 9.17 | 36.5 | 6.98 | 38.0 | 153  | 54.1 | 12.4 | 12.2 | 23.1 | 88.9 | 18.1 | 42.5 | 99.4 | 38.9 | 7.56 | 28.3 | 6.52 | 41.8 | 11.3 | 5.20 | 25.2 | 27.1 | 10.9 |
| 4       | 3.44 | 14.7 | 19.1 | 16.8 | 24.4 | 433  | 17.1 | 205  | 3.04 | 7.92 | 53.8 | 13.4 | 36.8 | 162  | 19.7 | 9.16 | 2.92 | 1.78 | 20.5 | 4.30 | 9.50 | 11.5 | 16.9 | 7.28 |
| 5       | 1.86 | 21.9 | 31.1 | 25.7 | 27.0 | 128  | 21.4 | 24.2 | 4.72 | 28.8 | 69.4 | 31.2 | 34.8 | 97.8 | 28.0 | 8.83 | 1.24 | 10.2 | 33.2 | 6.56 | 6.72 | 34.8 | 16.5 | 13.3 |
| 6       | 4.01 | 15.6 | 40.3 | 21.9 | 32.0 | 118  | 37.4 | 8.29 | 9.46 | 27.5 | 83.5 | 24.3 | 42.3 | 91.3 | 29.5 | 6.51 | 3.12 | 6.04 | 35.9 | 18.4 | 9.07 | 39.1 | 26.6 | 11.9 |
| 7       | 3.79 | 21.9 | 81.2 | 16.9 | 19.0 | 82.0 | 36.7 | 6.57 | 3.80 | 19.3 | 130  | 15.2 | 20.1 | 93.1 | 31.3 | 4.36 | 2.86 | 5.45 | 104  | 10.0 | 9.73 | 48.4 | 52.4 | 8.37 |
| 8       | 4.96 | 15.1 | 50.5 | 7.98 | 32.2 | 138  | 23.1 | 15.9 | 12.0 | 21.7 | 100  | 12.9 | 43.1 | 117  | 33.1 | 7.75 | 1.98 | 4.67 | 46.7 | 6.85 | 7.19 | 34.9 | 19.1 | 12.5 |
| 9       | 2.89 | 28.6 | 34.8 | 13.6 | 24.8 | 227  | 20.2 | 79.5 | 3.01 | 8.35 | 55.4 | 6.68 | 28.0 | 138  | 27.2 | 8.17 | 1.59 | 7.99 | 37.6 | 3.68 | 4.50 | 44.7 | 13.6 | 55.9 |
| 10      | 3.57 | 25.6 | 56.0 | 22.0 | 34.2 | 144  | 26.0 | 13.7 | 8.85 | 15.6 | 99.5 | 10.7 | 45.5 | 116  | 34.2 | 6.26 | 9.82 | 5.58 | 51.0 | 8.90 | 7.62 | 43.3 | 27.5 | 17.1 |
| 11      | n.d. |
| 12      | 2.08 | 17.4 | 65.8 | 29.1 | 9.65 | 78.5 | 27.3 | 11.8 | 3.44 | 31.8 | 132  | 36.2 | 14.8 | 95.3 | 31.5 | 4.22 | 2.03 | 4.02 | 47.0 | 14.9 | 2.81 | 28.3 | 20.3 | 2.11 |
| 13      | 2.17 | 14.0 | 31.9 | 14.2 | 25.6 | 191  | 21.7 | 20.5 | 4.41 | 16.9 | 80.0 | 13.0 | 33.8 | 87.6 | 38.5 | 7.61 | 2.09 | 4.33 | 49.5 | 6.35 | 5.27 | 80.1 | 63.7 | 17.2 |
| 14      | 1.30 | 19.4 | 28.6 | 8.47 | 17.0 | 57.4 | 16.8 | 43.8 | 1.85 | 6.07 | 53.1 | 4.49 | 22.1 | 65.0 | 19.4 | 12.4 | 2.65 | 1.16 | 22.0 | 3.66 | 2.26 | 10.6 | 23.9 | 12.7 |
| 15      | 18.7 | 12.4 | 25.8 | 7.60 | 21.4 | 580  | 63.0 | 62.1 | 7.33 | 16.2 | 77.1 | 12.1 | 33.0 | 169  | 43.4 | 8.24 | 1.58 | 6.32 | 53.0 | 6.83 | 10.6 | 64.1 | 17.8 | 29.7 |
| 16      | 4.14 | 69.8 | 73.3 | 50.0 | 12.9 | 222  | 27.0 | 37.4 | 3.74 | 37.2 | 88.2 | 32.6 | 16.7 | 171  | 30.5 | 8.51 | 0.77 | 7.13 | 32.2 | 5.12 | 2.57 | 51.3 | 11.2 | 21.4 |
| 17      | 3.61 | 40.8 | 76.7 | 44.7 | 12.3 | 108  | 33.3 | 23.1 | 11.6 | 71.9 | 93.6 | 88.1 | 21.8 | 130  | 59.7 | 8.54 | 1.32 | 7.41 | 42.3 | 7.47 | 4.05 | 43.6 | 18.2 | 7.60 |
| 18      | 2.39 | 46.8 | 72.6 | 25.6 | 14.1 | 184  | 19.0 | 30.9 | 2.86 | 26.7 | 97.3 | 20.8 | 19.1 | 171  | 32.5 | 6.82 | 0.99 | 8.54 | 50.6 | 6.29 | 4.99 | 46.5 | 19.8 | 8.66 |

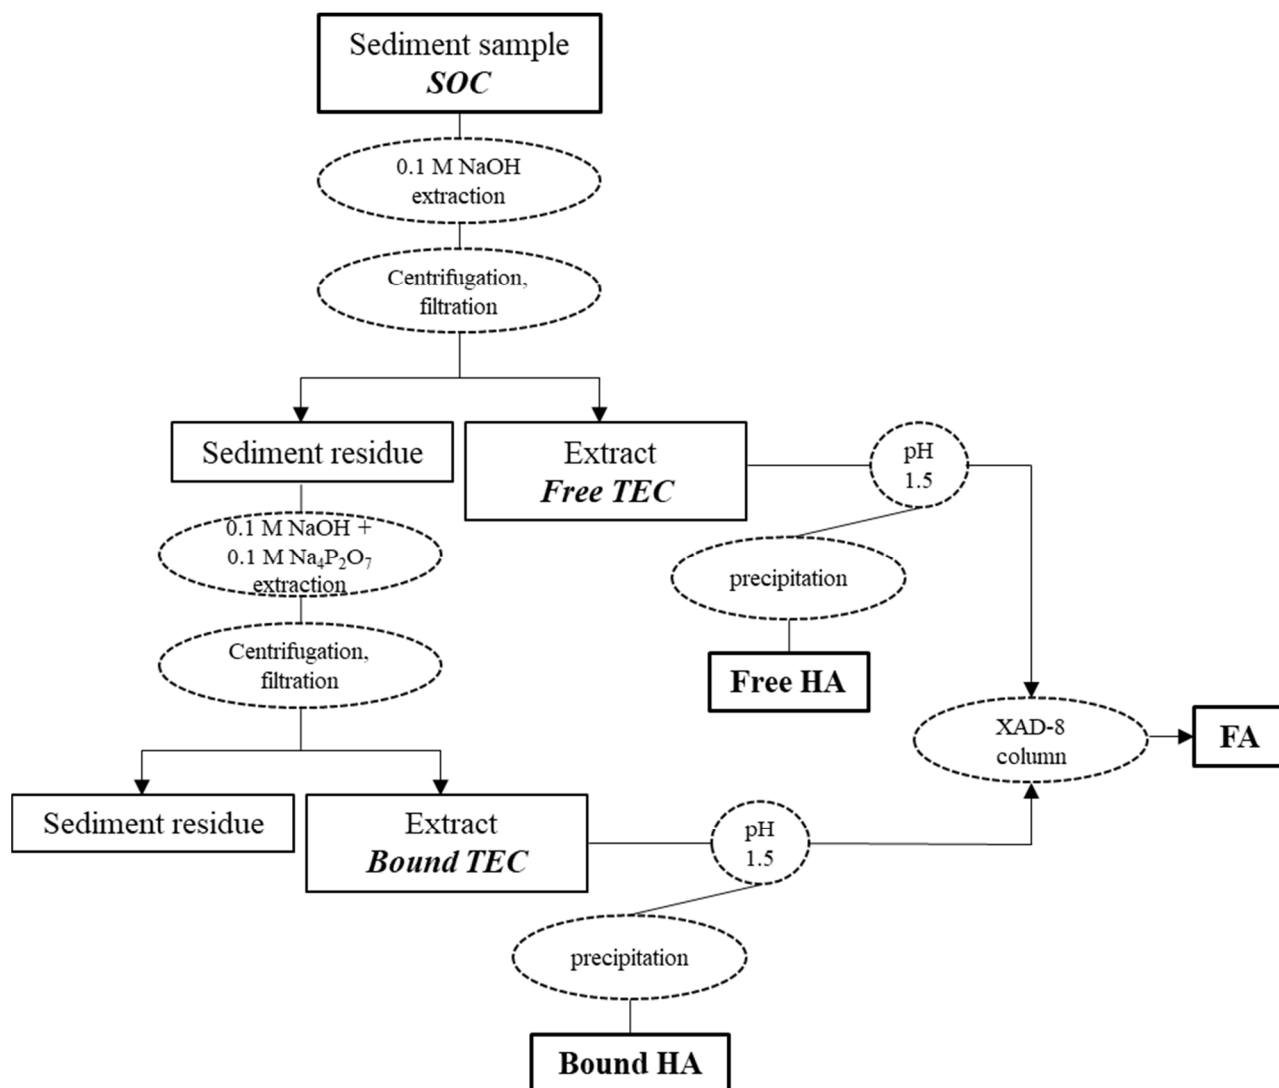

**Figure S1.** Flow chart of the method to extract Free Humic Acids (FHA), Bound Humic Acids (BHA), and Fulvic Acids (FA) from the sediment samples. SOC = Soil Organic Carbon; TEC = Total Extractable Carbon.
